1 **PERSPECTIVES**

2

3 **Niche construction in evolutionary theory: the construction of an academic**  
4 **niche?**

5

6 Manan Gupta<sup>1,2</sup>, N. G. Prasad<sup>3⊗</sup>, Sutirth Dey<sup>4⊗</sup>, Amitabh Joshi<sup>1⊗</sup> and T. N. C. Vidya<sup>2\*⊗</sup>

7

8 <sup>1</sup> *Evolutionary Biology Laboratory, Evolutionary and Organismal Biology Unit, Jawaharlal*  
9 *Nehru Centre for Advanced Scientific Research, Jakkur P.O., Bengaluru 560 064, India.*

10

11 <sup>2</sup> *Animal Behaviour and Sociogenetics Laboratory, Evolutionary and Organismal Biology Unit,*  
12 *Jawaharlal Nehru Centre for Advanced Scientific Research, Jakkur P.O., Bengaluru 560 064,*  
13 *India.*

14

15 <sup>3</sup> *Department of Biological Sciences, Indian Institute of Science Education and Research Mohali,*  
16 *Knowledge City, Sector 81, SAS Nagar, P.O. Manauli, Mohali, Punjab 140 306, India.*

17

18 <sup>4</sup> *Population Biology Laboratory, Biology Division, Indian Institute of Science Education and*  
19 *Research Pune, Dr. Homi Bhabha Road, Pune 411 008, India.*

20

21

22

23 **For correspondence:** Email: [tncvidya@jncasr.ac.in](mailto:tncvidya@jncasr.ac.in); [tncvidya@gmail.com](mailto:tncvidya@gmail.com)

24

25 <sup>⊗</sup> These authors contributed equally to this work. This is contribution no. 2 from FOGEG (see  
26 Acknowledgments for details).

27

28 **Running title:** *A critique of the claims of niche construction theorists*

29

30

31 **Abstract**

32 In recent years, fairly far-reaching claims have been repeatedly made about how niche  
33 construction, the modification by organisms of their environment, and that of other organisms,  
34 represents a vastly neglected phenomenon in ecological and evolutionary thought. The  
35 proponents of this view claim that the niche construction perspective greatly expands the scope  
36 of standard evolutionary theory and that niche construction deserves to be treated as a significant  
37 evolutionary process in its own right, almost at par with natural selection. Claims have also been  
38 advanced about how niche construction theory represents a substantial extension to, and re-  
39 orientation of, standard evolutionary theory, which is criticized as being narrowly gene-centric  
40 and ignoring the rich complexity and reciprocity of organism-environment interactions. We  
41 examine these claims in some detail and show that they do not stand up to scrutiny. We suggest  
42 that the manner in which niche construction theory is sought to be pushed in the literature is  
43 better viewed as an exercise in academic niche construction whereby, through incessant  
44 repetition of largely untenable claims, and the deployment of rhetorically appealing but logically  
45 dubious analogies, a receptive climate for a certain sub-discipline is sought to be manufactured  
46 within the scientific community. We see this as an unfortunate, but perhaps inevitable, nascent  
47 post-truth tendency within science.

48

49

50

51 **Key-words:** niche construction; standard evolutionary theory; coevolution; natural selection;  
52 philosophy of biology; post-truth.

53

54

## 55 **Introduction**

56 In recent decades, the phenomenon of niche construction (henceforth, NC) (Odling-Smee 1988)  
57 has been receiving a lot of attention in the evolutionary biology literature, with many arguments  
58 that a full consideration of this phenomenon as an evolutionary mechanism is a critical and  
59 consequential aspect of a new, extended, evolutionary synthesis (Laland 2015; Laland *et al.*  
60 2015). It has been suggested that an NC perspective goes beyond the standard thinking in  
61 evolutionary biology in significant ways, and that an incorporation of an NC perspective  
62 necessitates a major overhaul of how we think about the evolutionary process, especially the role  
63 of natural selection in promoting the evolution of adaptations (Laland 2015; Laland *et al.* 2014a,  
64 b, 2015). Just to cite a few representative examples from the last four years alone, it has been  
65 claimed that:

- 66 • *“Niche construction theory is more than just an alternative perspective; it is a serious*  
67 *body of formal evolutionary theory”* (Laland *et al.* 2014a);
- 68 • *“...developmental bias and niche construction may be viewed as essentially the same*  
69 *phenomena expressed inside and outside the organism”* (Laland *et al.* 2014b);
- 70 • *“Niche construction theory explicitly recognizes environmental modification by*  
71 *organisms (“niche construction”) and their legacy over time (“ecological inheritance”)*  
72 *to be evolutionary processes in their own right”* (Odling-Smee *et al.* 2013); and
- 73 • *“An extensive body of formal theory explores the evolutionary consequences of niche*  
74 *construction and its ramifications for evolutionary biology and ecology”* (Laland *et al.*  
75 2016).

76 These are non-trivial claims and, if justified, would certainly indicate that a major rethink of  
77 basic concepts in evolutionary biology is in order. In this article, we examine these claims in

78 some detail in order to assess whether these claims are, indeed, justified. As we will argue, a  
79 careful examination of these claims suggests that NCT is not quite as consequential as its  
80 proponents make it out to be and that, in particular, it does not necessitate any major rethinking  
81 of the conceptual structure of evolutionary theory. Several of the points we raise in our critical  
82 appraisal of the claims for NCT have been highlighted before (e.g. Dawkins 2004; Brodie III  
83 2005; Wallach 2016), while others are, to our knowledge, novel. However, given how frequently  
84 the claims for NCT are repeated, it is perhaps worth repeating the critiques of NCT, too.  
85 Otherwise, we risk the possibility of NCT becoming more important in the perception of  
86 evolutionary biologists than its reality would justify, in an ironic example of reproductive fitness  
87 of an over-blown idea driving an increase in its frequency to the detriment of other, more  
88 logically balanced, concepts. We suggest that standard (neo-Darwinian) evolutionary theory  
89 (henceforth, SET), properly understood and applied, provides an excellent and parsimonious  
90 framework for comprehending the evolutionary process, and that the proponents of NCT are  
91 unnecessarily pushing for a far more cumbersome and muddled conceptual construct.

92  
93 NC is defined as any activity of an organism which modifies its own selective environment, or  
94 the selective environments of other, con- or hetero-specific, organisms (Odling-Smee *et al.* 1996,  
95 2003, 2013). An oft-cited example of NC is the burrowing activity of earthworms in soil that, in  
96 turn, alters the morphology and chemistry of the soil by facilitating microbial activity (Hayes  
97 1983; Lee 1985). This process feeds back to future generations of earthworms and places novel  
98 selection pressures on their morphological and physiological phenotypes. As pointed out by  
99 Wray *et al.* (in Laland *et al.* 2014c), Darwin's (1881) last book was on earthworms and dealt, in  
100 part, with how “earthworms are adapted to thrive in an environment that they modify through

101 their own activities”. Surprisingly, although ideas about organisms changing their own selective  
102 environment have repeatedly been put forward in the past (Darwin 1859, 1881; Fisher 1930; Van  
103 Valen 1973, to cite just a few references), modern NCT traces its genesis to a formulation by  
104 Lewontin (Odling-Smee *et al.* 2003), who – in our opinion, rather unfairly and overly  
105 simplistically – characterised the SET view of the relationship between organism and  
106 environment by using two asymmetrically coupled differential equations (Lewontin 1983, 2000):

$$107 \quad dO/dt = f(O,E),$$

$$108 \quad dE/dt = g(E).$$

109 These equations suggest that change in the organismal domain is a function of both organism ( $O$ )  
110 and environment ( $E$ ), whereas change in the environmental domain is solely as a function of the  
111 environment itself. Lewontin (1983, 2000) proposed that the implicit assumption that organisms  
112 do not change their environments was unjustified and that, therefore, the second equation should  
113 be replaced by the following:

$$114 \quad dE/dt = g(O,E).$$

115 This new system of equations, thus, becomes symmetrically coupled by acknowledging the  
116 contribution of organisms to environmental change. This idea was taken further and explored in  
117 some detail by Odling-Smee, Laland, and Feldman (Odling-Smee 1988; Laland *et al.* 1996, 1999,  
118 2001). This initial work gave rise to several theoretical studies exploring different aspects of NC  
119 (reviewed in Odling-Smee *et al.* 2013), such as the effects of metapopulation structure on  
120 evolutionary dynamics of NC-related traits (Hui and Yue 2005; Borenstein *et al.* 2006; Silver  
121 and Di Paolo 2006; Han *et al.* 2006), inclusive fitness analyses of the evolutionary dynamics of  
122 NC-related traits (Lehmann 2008), the consequences of NC for kin selection and the evolution of  
123 co-operation (Lehmann 2007; Van Dyken and Wade 2012; Connelly *et al.* 2016), effects of niche

124 construction on metapopulation dynamics (Hui *et al.* 2004; Han *et al.* 2009; Zhang *et al.* 2012),  
125 and multi-strain or multi-species population dynamics (Krakauer *et al.* 2009).

126

127 Before we proceed to our critique, let us briefly state our position on NC right at the outset. We  
128 do not doubt that NC, even in a meaningfully narrower sense than used by its proponents (e.g. as  
129 cogently delineated by Dawkins 2004; Brodie III 2005), is an important and reasonably common  
130 ecological phenomenon that can have interesting evolutionary consequences. We disagree,  
131 however, that the phenomenon has been 'neglected' in SET, and we will argue that, on the  
132 contrary, the phenomenon has been extensively incorporated in both ecological and evolutionary  
133 studies for at least over a century. We also disagree with the quasi-philosophical arguments of its  
134 proponents that the NC perspective “entails that niche construction be regarded as a fundamental  
135 evolutionary process in its own right” (Laland *et al.* 2016), and we demonstrate the fallacies and  
136 misconceptions that underlie this assertion. We trace some of these misconceptions to  
137 fundamental confusions among the proponents of NCT about what the conceptual core of SET  
138 actually is: they appear to conflate a narrow one-locus population genetic representation of the  
139 evolutionary process with evolutionary theory. In particular, the proponents of NCT seem to be  
140 completely unaware of, or at least not engaged with, quantitative genetic thinking in evolutionary  
141 theory. Finally, we show that much of the published literature on NCT is not only unnecessarily  
142 repetitive, and muddled biologically and philosophically, but is also historically inaccurate in  
143 trying to claim a degree of originality for NCT that it just does not have. Overall, this leads us to  
144 suspect that NCT is less a serious and consequential evolutionary theory and more an example of  
145 academic niche construction in a nascent post-truth scientific world.

146

## 147 **Niche construction has not been 'neglected' in SET**

148 The proponents of NCT insist, despite criticism, on a very wide, all-encompassing definition of  
149 NC (Laland *et al.* 2005). Consider, for example, the following quotes from the NCT canon:  
150 “Organisms, through their metabolism, their activities, and their choices, define, partly create,  
151 and partly destroy their own niches. We refer to these phenomena as niche construction”  
152 (Odling-Smee *et al.* 1996) and “Niche construction is the process whereby organisms, through  
153 their metabolism, activities, and choices, modify their own and/or each others’ niches” (Odling-  
154 Smee *et al.* 2003). Given that everything an organism does, including living or dying, affects the  
155 environment, NC would appear to be a synonym of biology, in which case, we fail to see how it  
156 could be “neglected”. Nevertheless, the claim that NC has been “neglected” in SET is repeatedly  
157 made by the proponents of NCT, including in the eponymous sub-title of their book “*Niche*  
158 *construction: the neglected process in evolution*” (Odling-Smee *et al.* 2003). Even if we take a  
159 narrower definition of NC, as opposed to “niche changing”, as suggested by Dawkins (2004) and  
160 Brodie III (2005), it is hard to agree with the claim of “neglect”. Dawkins (2004) and Brodie III  
161 (2005), very correctly in our opinion, focus on the crucial issue of whether there are covariances  
162 between the variants of a 'constructed' aspect of the environment, variants of heritable  
163 organismal phenotypes, and the varying fitnesses of the latter. They argue that, if such  
164 covariances exist, then the phenomenon should be considered niche construction and, if they do  
165 not, it should be labelled niche changing, to emphasize that the environmental modification is  
166 simply a by-product, not the adaptive consequence of a variant phenotype's activity (Dawkins  
167 2004; Brodie III 2005). Even with this narrower definition of NC, the argument that SET has  
168 typically avoided incorporating a perspective wherein organisms can shape selection pressures,

169 for themselves and for other species, by altering the environment does not really stand in the face  
170 of the evidence, as we shall show below.

171  
172 The core of the Darwinian view of evolutionary change is the notion that the ecological struggle  
173 for existence can result in evolutionary change because heredity (in the sense of parent-offspring  
174 similarity) mediates the greater representation of ecologically successful variants in subsequent  
175 generations (Dobzhansky 1937; Gayon 1998). The struggle for existence is itself a very  
176 Malthusian (Malthus 1798) metaphor, premised upon the fact that increased depletion of  
177 available resources by an increasing population eventually has a negative impact upon  
178 population growth rates and, consequently, selects for greater competitive ability. Thus,  
179 individuals alter their environment as a result of feeding and, consequently, affect the selection  
180 pressures faced by themselves: in other words, a classic case of what is now labelled NC, but  
181 lurking at the very heart of the foundations of SET. If NC is enshrined at the core of SET, it is a  
182 bit odd to find repeated claims in the NCT literature of its neglect by SET and its practitioners.  
183 Indeed, it is our submission that phenomena that are now sought to be highlighted under the label  
184 of NC have been extensively incorporated into explanations of various ecological and  
185 evolutionary processes for well over the last 100 years. In the fields of population and  
186 community ecology, for example, the incorporation of such NC phenomena began with models  
187 of density-dependent population regulation like the logistic (Quetelet 1835), alluded to above.  
188 Subsequently, an NC perspective continued to be incorporated into experimental and  
189 manipulative studies aimed at elucidating the biological mechanisms of density-dependent  
190 population growth regulation and community structuring via competition or predation (reviewed  
191 in Kingsland 1982).



192

193 Another striking example of an NC perspective at the very core of SET is to be found in Fisher's  
194 (1918) conceptualization of the rest of the genome, including its allelic homologue, as  
195 constituting part of the environment of a focal allele at a given locus (Edwards 2014). Indeed,  
196 Fisher (1941) explicitly recognized that evolutionary change of allele frequency of the focal  
197 allele due to selection typically led to a change in the environment, including the 'genomic  
198 environment', in a manner that altered fitness of and, therefore, selection pressures on, the focal  
199 allele (discussed in Frank 1995). For example, consider the simple case of a one-locus, two-allele,  
200 viability selection model with over-dominance for fitness (i.e.  $\omega_{12} > \omega_{11}, \omega_{22}$  where  $\omega_{11}, \omega_{12}$  and  
201  $\omega_{22}$  are the fitnesses of the  $A_1A_1, A_1A_2$  and  $A_2A_2$  genotypes, respectively). Here, the steady state is  
202 a stable equilibrium allele frequency. Suppose the allele frequency of allele  $A_1$ , say  $p_1$ , is less  
203 than the equilibrium value  $p_1^*$ . In that case, in the next generation,  $p_1$  will increase. This increase  
204 automatically reduces the frequency of the allele  $A_2$  ( $p_2 = 1 - p_1$ ), which in Fisher's (1918, 1941)  
205 view is an alteration of the environment, resulting in a reduction of the marginal allelic fitness of  
206  $A_1$  (marginal allelic fitness of  $A_1 = p_1\omega_{11} + p_2\omega_{12}$ ). Thus, the very increase of  $p_1$  as a result of  
207 selection (differential fitnesses of the three genotypes) in itself affects the genomic environment  
208 at that locus and results in a reduction of the rate of increase of  $p_1$ . This is an excellent example  
209 of the kind of nuanced thinking about organism (in this case, allele) to environment feedbacks,  
210 resulting in an alteration of selection pressures, that NCT proponents claim is lacking in SET and,  
211 once again, it is found at the very heart of "gene-centric" SET.

212

213 Shifting our attention to theoretical studies of slightly more ecologically rich phenomena in  
214 evolution, like speciation, we again find a nuanced NC-like perspective even in studies firmly

215 within the gene-centric SET framework, conducted by people who would have defined  
216 themselves as firmly within the SET tradition. Consider the class of population genetic models of  
217 sympatric speciation, which began with Maynard Smith's (1966) eponymous paper, and are  
218 reviewed by Gavrillets (2006). In these models, the fitnesses of genotypes at a locus vary  
219 depending on which sub-habitat or niche is chosen by an organism. Such choice of habitat,  
220 incidentally, is considered to be NC by its proponents (Odling-Smee *et al.* 2003). In this set of  
221 models, choice of sub-habitat is arbitrarily fixed as a parameter and not modelled as being  
222 determined by genotypes at a locus, because the focus of the models is on the evolution of  
223 mating preferences. Similar models of host-choice evolution and sympatric speciation (e.g.  
224 Rausher 1984; Diehl and Bush 1989) have also been developed in which host choice is  
225 determined by genotypes at a preference locus, with the choice of host then determining fitnesses  
226 based on genotypes at a performance locus. Treating fitnesses on hosts 1 and 2 as conceptually  
227 the same as their being two separate traits (Falconer 1960), if there is antagonistic pleiotropy for  
228 fitness on alternative hosts, it drives epistasis for fitness between the preference and performance  
229 loci. If host preference in these models is specifically for oviposition, then the epistasis is trans-  
230 generational between maternal preference genotype and offspring performance genotype. All  
231 these models, thus, incorporate a very nuanced treatment of organisms affecting the selection  
232 pressures they (or their offspring) face through their choice of host or sub-habitat, something that  
233 the proponents of NCT maintain is generally missing in studies done within the SET framework.

234

235 If we switch our focus to empirical studies, we find that here, too, what is today called the NC  
236 perspective has actually been quite pervasive. In the relatively simplistic context of controlled-  
237 environment, single-species experimental evolution studies, experimenters impose selection

238 pressures on laboratory populations and examine how populations evolve in response to them  
239 (Garland and Rose 2009). Even in such simple laboratory systems, nuanced perspectives, that  
240 today would be labelled NC, have been deployed to understand evolutionary phenomena, long  
241 before NC became a fashionable appellation (e.g. see Mueller *et al.* 2005 for a review). For  
242 example, in a study of the evolution of adaptations to larval crowding in *Drosophila*  
243 *melanogaster*, Borash *et al.* (1998) detailed how the reducing food and increasing nitrogenous  
244 waste levels in the deteriorating environment of a crowded culture vial resulted in temporally  
245 varying selection pressures within a generation. This pattern of changing selection pressures  
246 within a generation, in turn, mediated the evolution of a polymorphism, with early-developing  
247 larvae being faster feeders and late-developing larvae being more waste tolerant. These temporal  
248 changes in the environment, and the selection pressures they affected, were directly caused by  
249 the activities of the feeding and excreting larvae. Subsequently, similar studies have revealed that  
250 the evolutionary outcomes of the selection pressures resulting from the deterioration of the food  
251 environment in a crowded *Drosophila* culture further depend on aspects of the environment, such  
252 as the total amount of food available for waste to diffuse into (Nagarajan *et al.* 2016; Sarangi *et*  
253 *al.* 2016), and whether or not there are opportunities, resulting fortuitously from the husbandry  
254 techniques employed, for assortative mating with regard to development time (Archana 2010).  
255 The point we wish to stress is that the authors of all these studies have undertaken a very  
256 nuanced approach to understanding the selection pressures facing populations of *Drosophila* in  
257 cultures subjected to larval crowding in various ways. Their approach includes an explicit  
258 incorporation of the manner in which the activities of the larvae alter the environment and how  
259 that, in turn, modifies the selection pressures they face. These selection pressures then, in turn,  
260 interact with other specific aspects of the environment to result in varying evolutionary

261 trajectories across studies. The results of many such studies linking demography, life-history,  
262 adaptations to crowding and population dynamics are reviewed by Mueller *et al.* (2005). We  
263 emphasize here that all these authors would place themselves squarely within the SET tradition  
264 and they have accomplished their analyses of a complex interplay between organism and  
265 environment in an evolutionary context without recourse to the specific conceptualizations or  
266 terminology of NCT. These examples, to our minds, are particularly striking because these are  
267 studies conducted within the laboratory selection paradigm, a scenario most likely to  
268 approximate the criticism of neglecting organism-to-environment-to-selection feedback that is  
269 routinely levelled against practitioners of SET by the proponents of NCT.

270

271 If one shifts focus from laboratory selection studies to studies of evolutionary phenomena in wild  
272 populations, the NC perspective is even more pervasive, although without the use of the NC  
273 label. As Thompson (1994) has detailed, a nuanced and detailed appreciation of how interacting  
274 organisms shape each others' selection pressures and evolution is apparent even in the earliest  
275 late-nineteenth century studies of flower-pollinator coevolution and mimicry, some of the first  
276 attempts to understand diversity through the lens of natural selection. Indeed, the vast number of  
277 studies in the broad area of coevolution are suffused with the kind of appreciation of how subtle  
278 the reciprocal interactions between organisms and their biotic and abiotic environments are, and  
279 how they shape coevolutionary trajectories, that NCT proponents claim is generally missing in  
280 studies within the framework of SET. These studies encompass varied ecological and  
281 evolutionary nuances of species interactions ranging from competition to mutualism, including  
282 various aspects of predation, grazing and parasitism. This huge body of work is discussed in  
283 detail by Thompson (1994, 2005, 2013) and we will not dwell on it further.

284

285 Even in the realm of human cultural (or gene-culture) evolution, which is often highlighted as a  
286 clinching example of how a NC perspective yields insights beyond those available using SET  
287 (Laland *et al.* 2000, 2001, 2016; Odling-Smee *et al.* 2003; Laland and Sterelny 2006; O'Brien  
288 and Laland 2012), the claims of NCT proponents are somewhat overblown. The two examples  
289 most commonly cited in this context by NCT proponents are those of the evolution of the ability  
290 to use lactose as adults in human societies with a history of cattle husbandry and the high  
291 incidence of sickle cell anaemia in human populations with a high incidence of malaria due to  
292 the adoption of yam cultivation, respectively (Laland *et al.* 2000, 2001; Odling-Smee *et al.* 2003;  
293 Laland and Sterelny 2006; O'Brien and Laland 2012). However, our understanding of the causes  
294 underlying these evolutionary phenomena, and their rooting in human animal husbandry or  
295 farming activities, precedes the development of NCT by one or two decades (Wallach 2016).  
296 Indeed, to quote Wallach (2016): “These phenomena, as well as their causal relations to human  
297 activities, were not predicted or inferred from NCT, *nor was the formulation of NCT required for*  
298 *their explanation* (emphasis in the original)” and “In both cases, it is gene-culture co-evolution  
299 that does all the explanatory work, with NCT contributing nothing but an - arguably, apt -  
300 descriptive metaphor”.

301

302 Another claim by the proponents of NCT that is connected with the “neglect” argument is that  
303 Odling-Smee (1988) was the “first to introduce the concept of 'ecological inheritance'” (Laland *et*  
304 *al.* 2016). This claim, too, is untenable, together with similar claims about how SET has  
305 neglected phenomena like phenotypic plasticity and NC (Laland *et al.* 2014c). Almost from its  
306 inception, quantitative genetics has been concerned with what are now called ecological

307 inheritance and phenotypic plasticity (discussed in Prasad *et al.* 2015). Even basic textbooks of  
308 quantitative genetics (e.g. Falconer 1960) include extensive discussion of phenotypic similarity  
309 between parents and offspring due to shared environments, resulting in a positive parent-  
310 offspring covariance for environmental effects on phenotypic value. This is exactly the same  
311 concept that is now termed ecological inheritance in NCT. The notion in quantitative genetics of  
312 a covariance between genotypic value and environmental value of a trait clearly reflects a point  
313 of view that at least clearly acknowledges that genotype can affect the manner in which  
314 environment affects phenotype. This could, of course, result from certain genotypes responding  
315 differentially to certain environments but, equally, it is clear that genotype-environment  
316 covariance also encompasses all phenomena that are labelled as NC. Similarly, the very  
317 partitioning of phenotypic value into a genotypic and an environmental component in  
318 quantitative genetics exemplifies an appreciation of phenotypic plasticity as a concept and a  
319 phenomenon. Moreover, the quantitative genetic notion of genotype  $\times$  environment interaction  
320 reflects an appreciation that there may be genetic variation for the degree and nature of  
321 phenotypic plasticity in a population. Indeed, the recent deployment of the concept of inclusive  
322 heritability (Danchin and Wagner 2010) in the context of an expanded and slightly modified  
323 quantitative genetics framework for analysing evolutionary change (Danchin *et al.* 2011), just  
324 serves to underscore the versatility and flexibility of the original, essentially phenotypic,  
325 formulation of evolutionary change under selection in classical quantitative genetics. While the  
326 proponents of NCT cite some of this work (e.g. in Laland *et al.* 2016), they seem to entirely miss  
327 the important corollary that, if all forms of non-genic inheritance fit comfortably within the basic  
328 framework of quantitative genetics, then clearly the classical formulations of SET are far more  
329 flexible and encompassing than the proponents of NCT give them credit for.

330

331 To sum up, we believe that the claim by proponents of NCT that NC and ecological inheritance  
332 have been neglected in evolutionary biology research carried out under the framework of SET is  
333 not tenable. On the contrary, the kind of nuanced appreciation of how organisms shape their  
334 abiotic and biotic environments and, thereby, the selection pressures they face, which the  
335 proponents of NCT claim to be largely missing from work done in the SET framework, is  
336 actually ubiquitous in such work. Such a nuanced appreciation of the interactive nature of  
337 ecological relationships is abundantly reflected in mainstream evolutionary biological work right  
338 from the time of Darwin and Haeckel (Gayon 1998; Richards 2008), through the decades of the  
339 crystallization of SET in the early twentieth century (Gayon 1998), and well into present times  
340 (Thompson 1994, 2005, 2013). Moreover, this nuanced appreciation of the richness of ecological  
341 relationships, and its deployment in evolutionary explanation, is seen in *a priori* 'gene-centric'  
342 theory, in theory slightly more responsive to ecological realities, whether in the laboratory or the  
343 wild, and in empirical studies on laboratory or wild populations and communities. Given all the  
344 examples quoted above, and there are countless more for each claim that we could not quote for  
345 want of space, our question to the proponents of NCT is: What *exactly* has been neglected by  
346 SET that NCT claims to incorporate?

347

### 348 **NCT models do not constitute an 'extensive body of formal theory'**

349 Here, we first briefly discuss three early and often cited models of niche construction that have  
350 been described as extending the understanding possible through SET and also as constituting an  
351 extensive body of formal theory (Laland *et al.* 2016) (these models are further discussed at  
352 length in Appendix 1). We then touch upon some other theoretical developments in NCT. Two

353 of the three early models (Laland *et al.* 1996, 1999) are based on standard di-allelic two locus  
354 population genetic models with multiplicative fitnesses (general discussion in Hartl and Clark  
355 1989), where one locus specifies a niche constructing phenotype which, in turn, affects fitness  
356 through genotypes at the second locus as a result of the specific environmental perturbations it  
357 causes. The third model (Laland *et al.* 2001) is a gene-culture coevolution model where the niche  
358 constructing trait is culturally inherited. Our main purpose in presenting the models in the  
359 appendix is to show the mathematically inclined readers how these models are simple  
360 extensions/variants of standard population genetics formulations. The mathematically  
361 disinterested reader can safely ignore Appendix 1 and continue reading about our major  
362 comments on these models.

363

364 These three early models consider a very specific form of niche construction, i.e., where the  
365 niche constructing activity of individuals, mediated by locus or cultural trait  $E$ , affects a common  
366 resource utilized by all members of the population. This resource affects selection at another  
367 locus  $A$  and the selection pressure, thus, depends on the frequency of allele/trait  $E$ . Consequently,  
368 the benefits or costs of niche construction are shared by all individuals irrespective of their own  
369 niche construction ability. Thus, these models cannot be used to analyse the effects or niche  
370 constructing phenotypes such as nest building, parental care, or habitat selection. Laland *et al.*  
371 (2005) have conceded this point, raised by Okasha (2005), and agree that a lack of spatial  
372 structuring in their models allows all individuals to benefit from the effects of niche construction,  
373 irrespective of whether or not they express the niche constructing phenotype.

374



375 The results from this set of models are what one would expect from a two-locus multiplicative  
376 fitness model with fitness at one locus being affected by the other in an epistatic and frequency-  
377 dependent manner, even if there were no niche construction involved (e.g. Bodmer and  
378 Felsenstein 1967; Karlin and Feldman 1970; Feldman *et al.* 1975; Karlin and Liberman 1979;  
379 Hastings 1981; Christiansen 1990). These results include changing the position of equilibria  
380 expected in a situation without frequency-dependent selection, appearance of new  
381 polymorphisms, disappearance of otherwise expected polymorphisms, fixation of traits which are  
382 otherwise deleterious, etc. (for details, see Appendix 1). The point at which niche construction  
383 differentiates these models from the ones without niche construction is the appearance of time  
384 lags between selection on the niche constructing locus and the response to changes in the  
385 allele/trait frequencies at the other locus. This can also lead to evolutionary momentum where  
386 selection at the second locus continues for some time after selection at the niche constructing  
387 locus has stopped or reversed. Similar effects have been seen in population genetic models of  
388 host specialization where there is a generational lag in the epistatic effects on fitness of  
389 genotypes at a maternal preference locus and an offspring performance locus (Rausher 1984;  
390 Diehl and Bush 1989), as well as in models of maternal inheritance (Kirkpatrick and Lande 1989)  
391 and early, pre-NCT, gene-culture coevolution (Feldman and Cavalli-Sforza 1976).

392

393 The main point we wish to make is that the results of these models are neither surprising nor  
394 unexpected in the context of SET. Two (or more) locus models with pleiotropic and epistatic  
395 effects on fitness, with or without time lags, are well known within gene-centric SET to yield  
396 outcomes and dynamics that can differ from simpler, similar models without epistasis (Hartl and  
397 Clark 1989). Indeed, gene-by-gene interactions, whether within- or between-loci, can yield

398 seemingly unexpected results, even without time-lags. For example, under-dominance for fitness  
399 at one locus can, seemingly paradoxically, result in the fixation of a sub-optimal phenotype due  
400 to initial conditions fortuitously being what they were, unlike what is possible in a one-locus  
401 model of viability selection without under-dominance. We do not believe that it therefore follows  
402 that under-dominance is a major evolutionary process in its own right, or that a few models of  
403 over-dominance and under-dominance need to be elevated to the status of a major evolutionary  
404 theory to be set up in competition to SET. Essentially, the 'formal theory' pertaining to models of  
405 the evolutionary consequences of niche construction rests upon the demonstration that, because  
406 niche construction can induce time-lagged epistasis for fitness, it can result in evolutionary  
407 outcomes that are unexpected in the context of simpler population genetic models lacking such  
408 time-lagged epistatic effects. This does not in any way supersede SET, unless one implicitly  
409 defines SET as taking no cognizance of gene-by-gene interactions.

410

411 In addition to the three models we discuss in the appendix (Laland *et al.* 1996, 1999, 2001), the  
412 “extensive body of formal theory (that) explores the evolutionary consequences of niche  
413 construction and its ramifications for evolutionary biology and ecology” (Laland *et al.* 2016)  
414 consists of a handful of models, some of which extend the logic of Laland *et al.* (2001) by  
415 showing how incorporating NC into simpler models can result in novel outcomes, including the  
416 evolution of niche construction (Silver and Di Paolo 2006; Creanza and Feldman 2014). Some  
417 other models explore the role of NC in facilitating altruism (Lehmann 2008; Van Dyken and  
418 Wade 2012), whereas others suggest that NC can facilitate range expansion and coevolution  
419 (Kylafis and Loreau 2008; Krakauer *et al.* 2009), neither of which are a great surprise to  
420 practitioners of SET. We frankly fail to understand how or why we are expected to acknowledge

421 this handful of models as an extensive body of formal theory that somehow significantly  
422 supersedes or, at least significantly extends, SET. These papers taken together would not even  
423 compare favourably with one SET paper, that of Fisher (1918), in terms of the novel  
424 evolutionary insights they provide.

425

426 In light of the arguments above, and the detailed discussion in Appendix 1, we pose two  
427 questions here. First, what are the theoretical papers on NCT (barring those that we cite  
428 ourselves) that, taken together, could justify the label “extensive body of formal theory”? Second,  
429 what are the major theoretical insights emanating from this “extensive body of formal theory”  
430 that are not intuitively obvious from analogous SET formulations?

431

### 432 **NC is not an evolutionary process at par with natural selection**

433 The proponents of NCT also make some quasi-philosophical claims that (a) NC and  
434 developmental bias are essentially two sides of the same coin, one internal and one external to  
435 the organism (Laland *et al.* 2008, 2014b); (b) NC is a fundamental evolutionary process in its  
436 own right (Odling-Smee *et al.* 2013); and (c) NC as an 'evolutionary process' is somehow  
437 logically at par with natural selection in terms of its importance to 'causal' evolutionary  
438 explanations of adaptation (Laland 2015). One somewhat unique characteristic of the literature  
439 on NC is that the same few conceptual arguments are repeatedly made, in very similar words, in  
440 multiple publications. Consequently, to avoid having to keep referencing multiple papers that say  
441 almost the same things, we focus our critique of these quasi-philosophical claims on their most  
442 recent detailed exposition (Laland 2015).

443

444 Essentially, these claims are premised upon the argument that the process of adaptive evolution  
445 has two major steps: the generation of variation and the sorting of this variation such that the  
446 frequency of better adapted variants increases. This is an old and venerable view, going back at  
447 least to Bateson (1894) and De Vries (1909), and also articulated in some detail in recent times  
448 by Endler (1986). We agree with this depiction of the adaptive evolutionary process. Laland  
449 (2015) argues that phenomena acting at the first of these two steps have not typically been  
450 regarded as 'evolutionary processes', whereas phenomena acting at the second step, such as  
451 natural selection, have. Laland (2015) further traces the roots of this distinction between  
452 evolutionary processes like selection on the one hand, and background conditions that alter the  
453 form of selection, or the extent of variation available to selection, on the other, to Mayr's (1961)  
454 distinction between proximate and ultimate causes in biological explanation. Specifically, Laland  
455 (2015) argues that background conditions, such as niche construction or developmental bias, that  
456 shape the specific instantiation of a (proximal) causal process like selection should not be  
457 neglected as causal processes. We believe that Laland (2015) misses the point that natural  
458 selection is an ultimate cause when thinking of a phenotype, but a proximate cause when  
459 thinking of change in the composition of a population with regard to the variants it contains. For  
460 example, if one is interested in the differences in beak shape among the various species of  
461 Darwin's finches on the Galapagos islands, natural selection is invoked as an ultimate cause,  
462 whereas the proximate cause(s) are to be sought in the ontogeny of beak development in the  
463 different species. However, if one is trying to understand why average beak length in a given  
464 species of Darwin's finch changes due to, say, a drought, then a specific instance of natural  
465 selection constitutes a proximate cause. Thus, the proximate-ultimate distinction in this context is  
466 really a red herring, because whether natural selection is a proximate or an ultimate cause

467 depends upon what exactly is sought to be explained. Essentially, natural selection is as much a  
468 proximate cause of evolutionary change as developmental-physiological mechanisms are  
469 proximate causes of a phenotype. It is not clear to us why the proponents of NCT consider  
470 proximate causes to be very important when thinking of phenotypes, but not when thinking of  
471 evolutionary change as the phenomenon whose various causes are to be delineated. Indeed, the  
472 relevant literature by NCT proponents gets fairly muddled on this point. The real issue is actually  
473 the contrast between a phenomenon acting at the 'sorting of variation' stage and one acting at the  
474 'generation of variation' stage.

475

476 As stated above, Laland (2015) argues that background conditions that shape the specific  
477 instantiation of a (proximal) causal process like selection should not themselves be neglected as  
478 causal processes. In a very broad sense, we do not disagree that background conditions can affect  
479 the nature of the outcome of a proximate causal process and, in that sense, considering  
480 background conditions can add to the richness of an explanation. However, this added richness is  
481 often of a specific and narrow kind. We will elaborate upon this point using Laland's (2015)  
482 analogy of a murder trial in which he writes, “we would not be optimistic about the chances of  
483 the defendant in the dock receiving a ‘not guilty’ verdict if their defence was based on the  
484 argument that they did not cause the death of the victim that they shot – that was the bullet – they  
485 only pulled the trigger”. In this analogy, the evolutionary change is the death of the victim, the  
486 bullet is natural selection, and the defendant deciding to pull the trigger is the background  
487 condition shaping the specific form that selection took in this particular instantiation. The  
488 argument deployed by Laland (2015) is that the judge, presumably representing an enlightened  
489 NC theorist, will give more, or equal, importance to the background condition as compared to

490 selection. However, the analogy is actually flawed because the judge in this example is  
491 specifically tasked with ascertaining human agency – his or her brief is to ascertain whether the  
492 defendant is guilty of the murder or not. In the mapping of this analogy on to the evolutionary  
493 process, there is no equivalent of the need to establish agency. Evolutionary theory attempts an  
494 explanation of the process of adaptive evolution, and steers clear of any requirement of  
495 establishing agency for one or another process. Once the consideration of establishing agency is  
496 removed, and the focus is on the facts of the case, as would be the situation for evolutionary  
497 theory, the situation becomes quite different from that presented by Laland (2015): an autopsy  
498 report, which is not concerned with agency and is therefore the appropriate analogue of  
499 evolutionary theory in this example, will simply record the cause of death as a bullet wound  
500 suffered by the victim!

501  
502 The error implicit in conflating the logical causal status of proximate causal processes and  
503 background conditions can be seen clearly using a different analogy, also used to great effect by  
504 Darwin (quoted at length in Gayon 1998, pgs. 52-53). The designing and construction of a  
505 building is constrained first by the laws of physics and, secondarily, by the availability of  
506 materials due to accessibility or finances or both. But within these background constraints,  
507 architects and their style of architecture exert great influence on the final form that the building  
508 takes. Laland's (2015) argument is essentially a plea for giving equal importance to the laws of  
509 physics and material availability on the one hand, and the design of the architect on the other, as  
510 an explanation of the final form of a building. While not denying the role of the background  
511 conditions, we would suggest that the proximate cause of the architect's design has far greater  
512 explanatory power in explaining the final form of the building, as compared to the background

513 conditions. That is why, despite the laws of physics, the use of white marble as the primary  
514 construction material, and even the *raison d'être*, being the same in both cases, the Lincoln  
515 Memorial in Washington DC and the Taj Mahal in Agra do not look particularly similar: the  
516 differences arise from one being designed in the Doric style and the other in the Indo-Persian  
517 style.

518

519 The second aspect of Laland's (2015) conflation of NC and selection as causal evolutionary  
520 processes that we disagree with stems from our distinction between a phenomenon *per se* and the  
521 conditions that cause the phenomenon to occur in a particular manner in a specific instantiation  
522 of that phenomenon. Natural selection is a phenomenon that results from the sorting of variants  
523 such that the frequency of better adapted variants increases. NC is a phenomenon that can shape  
524 the manner in which selection acts in any particular case and, thereby, affect precisely which  
525 variants end up increasing or decreasing in frequency as a result of selection. These two  
526 phenomena are clearly not of the same type with regard to their roles in the adaptive evolutionary  
527 process. NC affects the way in which selection acts. Its role is thus of a modifier which affects  
528 how a certain category of evolutionary process acts in a given instantiation, whereas selection  
529 has a very different logical or epistemic status as a specific category of process. We see the  
530 attempts to join NC with developmental bias (Laland *et al.* 2008, 2014b; Laland 2015, 16) as an  
531 essentially flawed attempt to make this joint phenomenon appear more important than NC alone,  
532 because conflating the two also gives the joint phenomenon a double role in affecting the  
533 'generation of variation' step as well as mediating the specific instantiation of selection in the  
534 'sorting of variation' step. Nevertheless, it does not alter the fact that in both cases, it is a specific  
535 instantiation of selection that is being altered by NC or development bias.

536

537 To sum up, although we agree that both the generation and sorting of variants are important parts  
538 of the overall process of adaptive evolution, we do not agree that NC/developmental bias have a  
539 logical or epistemic status in explanations of adaptive evolution equivalent to that of natural  
540 selection. In the context of adaptive evolutionary change, natural selection is the proximate cause  
541 of changes in population composition and is, therefore, a general principle rather than a  
542 phenomenon that exists as a specific instantiation of a general principle. Consequently, the  
543 position or status of natural selection in explanations of adaptive evolution is epistemically  
544 distinct from that of phenomena that either constrain the range of variation that selection sorts, or  
545 that modulate which variants selection happens to sort for in a given scenario.

546

### 547 **Concluding remarks**

548 Over the past decade or so, there has been an increasing realization that there are serious  
549 problems with the way science is being done, published and evaluated (Lawrence 2003;  
550 Ioannidis 2005; Song *et al.* 2010; American Society for Cell Biology 2012; Balaram 2013; Head  
551 *et al.* 2015; Horton 2015; Smaldino and McElreath 2016). Of particular concern (possibly even  
552 replacing plagiarism concerns of a few years prior), are an increasing tendency to not reference  
553 prior work properly, in order to be able to bolster exaggerated claims of novelty (Robinson and  
554 Goodman 2011; Teixeira *et al.* 2013; Maes 2015), as well as an increasing trend of setting up  
555 one's work as a competing counterpoint to some dominant idea in the field, even if the work is  
556 actually complementary to that dominant idea. The published work on NCT, especially after  
557 Odling-Smee *et al.* (2003), exemplifies this state of affairs.

558



559 Proponents of NCT make a few claims repeatedly: (i) NC and ecological inheritance have been  
560 neglected; (ii) there is a vast body of formal theory on NC and its ecological and evolutionary  
561 consequences that is a significant addition to SET; and (iii) NC and, more recently,  
562 NC/developmental bias are important evolutionary processes at par with natural selection in the  
563 context of explaining adaptive evolution. These claims are repeated, often in similar language  
564 and with the same examples and analogies, in paper after paper. Indeed, examining the fairly  
565 voluminous literature on NCT after the book by Odling-Smee *et al.* (2003), we find that hardly  
566 anything new has been said, with the exception of the more recent claims that developmental  
567 bias and niche construction are conceptually two sides of the same coin (Laland *et al.* 2008;  
568 2014b; Laland 2015, 2016). Characteristically, even this claim has been repeated multiple times  
569 over the past several years, without any new arguments or facts being deployed to bolster it.

570

571 As we have argued here, we believe the facts clearly suggest that the first two claims are just  
572 plain wrong. We wonder whether that is why they need so much repetition. The third claim, we  
573 have argued here, is based on philosophically muddled thinking and inappropriate analogies.  
574 Thus, we believe that the scientific case being made by the proponents of NCT is weak, and their  
575 work and perspective is being sought to be made to appear far more novel, revolutionary and  
576 consequential than it really is. It is this latter point that we find disturbing and, more importantly,  
577 detrimental to the way in which science is done. Incessant repetition of claims that do not stand  
578 up to critical scrutiny, an avoidance of specifically responding to particular criticisms in favour  
579 of diffuse and generalized responses, and the deployment of dubious analogies are all aspects of  
580 rhetoric that are unfortunately becoming familiar worldwide in what is often being described as a  
581 post-truth world. We are dismayed that they have also made an entry into the scientific discourse

582 and that is why we wonder whether this constant pushing of untenable claims regarding NCT is  
583 actually an instantiation of academic niche construction.

584

## 585 **Acknowledgments**

586 This is contribution no. 2 from the Foundations of Genetics and Evolution Group (FOGEG).  
587 FOGEG is an informal association of SD, AJ, NGP and TNCV (and, sometimes, some of their  
588 students) getting together periodically to work on conceptual issues at the foundations of  
589 genetics and evolutionary biology. All four FOGEG authors contribute equally to the  
590 manuscripts and the sequence of these four authors is chosen at random for each submission. The  
591 last author acts as corresponding author for that submission. AJ thanks the Department of  
592 Science and Technology, Government of India, for support via a J. C. Bose Fellowship. SD,  
593 NGP and TNCV thank IISER Pune, IISER Mohali, and JNCASR, respectively, for in-house  
594 funding. MG is supported by a scholarship from JNCASR. We also thank the anonymous  
595 reviewers for helpful comments on the manuscript.

## 596 **References**

- 597 American Society for Cell Biology. 2012 San Francisco declaration on research assessment.  
598 <http://am.ascb.org/dora>. Accessed 24 December 2016.
- 599 Archana N. 2010 *The genetic architecture of fitness-related traits in populations of three*  
600 *species of Drosophila subjected to selection for adaptation to larval crowding*. Ph.D. thesis,  
601 Jawaharlal Nehru Centre for Advanced Scientific Research, Bengaluru, India.
- 602 Balaram P. 2013 Research assessment: declaring war on the impact factor. *Curr. Sci.* **104**,  
603 1267–1268.
- 604 Bateson W. 1894 *Materials for the study of variation, treated with especial regard to*  
605 *discontinuity in the origin of species*. Macmillan, London, UK.
- 606 Bodmer W. F. and Felsenstein J. 1967 Linkage and selection: theoretical analysis of the  
607 deterministic two locus random mating model. *Genetics* **57**, 237–265.
- 608 Borash D. J., Gibbs A. G., Joshi A. and Mueller L. D. 1998 A genetic polymorphism  
609 maintained by selection in a temporally varying environment. *Am. Nat.* **151**, 148–156.
- 610 Borenstein E., Kendal J. and Feldman M. 2006 Cultural niche construction in a  
611 metapopulation. *Theor. Popul. Biol.* **70**, 92–104.
- 612 Brodie III E. D. 2005 Caution: niche construction ahead. *Evolution* **59**, 249–251.
- 613 Christiansen F. B. 1990 The generalized multiplicative model for viability selection at  
614 multiple loci. *J. Math. Biol.* **29**, 99–129.
- 615 Connelly B. D., Dickinson K. J., Hammarlund S. P. and Kerr B. 2016 Negative niche  
616 construction favors the evolution of cooperation. *Evol. Ecol.* **30**, 267–283.
- 617 Creanza N. and Feldman M. W. 2014 Complexity in models of cultural niche construction  
618 with selection and homophily. *Proc. Nat. Acad. Sci. USA* **111**, 10830–10837.

- 619 Danchin E. and Wagner R. H. 2010 Inclusive heritability: combining genetic and non-genetic  
620 information to study animal behavior and culture. *Oikos* **119**, 210–218.
- 621 Danchin E., Charmantier A., Champagne F. A., Mesoudi A., Pujol B. and Blanchet S. 2011  
622 Beyond DNA: integrating inclusive inheritance into an extended theory of evolution. *Nat.*  
623 *Rev. Genet.* **12**, 475–486.
- 624 Darwin C. 1859 *On the origin of species by means of natural selection, or the preservation of*  
625 *favoured races in the struggle for life*. John Murray, London, UK.
- 626 Darwin C. 1881 *The formation of vegetable mould through the action of worms, with*  
627 *observations on their habits*. John Murray, London, UK.
- 628 Dawkins R. 2004 Extended phenotype – but not too extended. *Biol. Philos.* **19**, 377–396.
- 629 De Vries H. 1909 *The mutation theory: experiments and observations on the origin of*  
630 *species in the vegetable kingdom* (Farmer J. B. and Darbishire A. D., translators). Pen Curt,  
631 Chicago, IL, USA.
- 632 Diehl S. R. and Bush G. L. 1989 The role of habitat preference in adaptation and speciation.  
633 In *Speciation and its consequences* (Otte D., Endler J. E., eds.), pp. 345-365. Sinauer,  
634 Sunderland, MA, USA.
- 635 Dobzhansky T. 1937 *Genetics and the origin of species*. Columbia University Press, New  
636 York, NY, USA.
- 637 Edwards A. W. F. 2014 R.A. Fisher's gene-centred view of evolution and the Fundamental  
638 Theorem of Natural Selection. *Biol. Rev.* **89**, 135–147.
- 639 Endler J. A. 1986 The newer synthesis? Some conceptual problems in evolutionary biology.  
640 *Oxford Surv. Evol. Biol.* **3**, 224–243.

- 641 Falconer D. S. 1960 *Introduction to quantitative genetics*. Oliver and Boyd, Ltd., Edinburgh,  
642 UK.
- 643 Feldman M. W. and Cavalli-Sforza L. L. 1976 Cultural and biological evolutionary  
644 processes, selection for a trait under complex transmission. *Theor. Popul. Biol.* **9**, 238–259.
- 645 Feldman M. W., Lewontin, R. C., Franklin I. R. and Christiansen F. B. 1975 Selection in  
646 complex genetic systems III. An effect of allele multiplicity with two loci. *Genetics* **79**, 333–  
647 347.
- 648 Fisher R. A. 1918 The correlation between relatives on the supposition of Mendelian  
649 inheritance. *Trans. R. Soc. Edin.* **52**, 399–433.
- 650 Fisher R. A. 1930 *The genetical theory of natural selection: a complete variorum edition*.  
651 Oxford University Press, Oxford, UK.
- 652 Fisher R. A. 1941 Average excess and average effect of a gene substitution. *Ann. Eugen.* **11**,  
653 53–63.
- 654 Frank S. A. 1995 George Price's contributions to evolutionary genetics. *J. Theor. Biol.* **175**,  
655 373–388.
- 656 Garland T. and Rose M. R. 2009 *Experimental evolution*. University of California Press,  
657 Oakland, CA, USA.
- 658 Gavrilets S. 2006 The Maynard Smith model of sympatric speciation. *J. Theor. Biol.* **239**,  
659 172–182.
- 660 Gayon J. 1998 *Darwinism's struggle for survival*. Cambridge University Press, Cambridge,  
661 UK.

- 662 Han X., Li Z., Hui C. and Zhang F. 2006 Polymorphism maintenance in a spatially  
663 structured population: a two-locus genetic model of niche construction. *Ecol. Modell.* **192**,  
664 160–174.
- 665 Han X., Hui C. and Zhang Y. 2009 Effects of time-lagged niche construction on  
666 metapopulation dynamics and environmental heterogeneity. *Appl. Math. Comput.* **215**, 449–  
667 458.
- 668 Hastings A. 1981 Simultaneous stability of  $D = 0$  and  $D \neq 0$  for multiplicative viabilities at  
669 two loci: an analytical study. *J. Theor. Biol.* **89**, 69–81.
- 670 Hartl D. L. and Clark A. G. 1989 *Principles of population genetics*, 2<sup>nd</sup> Ed. Sinauer,  
671 Sunderland, MA, USA.
- 672 Hayes M. B. 1983 Darwin’s ‘vegetable mould’ and some modern concepts of humus  
673 structure and soil aggregation. In *Earthworm ecology: from Darwin to vermiculture* (ed. J. E.  
674 Satchell), pp. 19-33. Chapman & Hall, London, UK.
- 675 Head M. L., Holman L., Lanfear R., Kahn A. T. and Jennions M. D. 2015 The extent and  
676 consequences of  $p$ -hacking in science. *PLoS Biol.* **13**, e1002106.
- 677 Horton R. 2015 Offline: what is medicine’s 5 sigma? *Lancet* **385**, 1380.
- 678 Hui C. and Yue D. 2005 Niche construction and polymorphism maintenance in  
679 metapopulations. *Ecol. Res.* **20**, 115–119.
- 680 Hui C., Li Z. and Yue D. X. 2004 Metapopulation dynamics and distribution, and  
681 environmental heterogeneity induced by niche construction. *Ecol. Modell.* **177**, 107–118.
- 682 Ioannidis J. P. A. 2005 Why most published research findings are false. *PLoS Med.* **2**, e124.
- 683 Karlin S. 1975 General two-locus selection models: some objectives, results and  
684 interpretations. *Theor. Popul. Biol.* **7**, 364–398.

- 685 Karlin S. and Feldman M. W. 1970 Linkage and selection: two locus symmetric viability  
686 model. *Theor. Popul. Biol.* **1**, 39–71.
- 687 Karlin S. and Liberman U. 1979 Central equilibria in multilocus systems. I. Generalized  
688 nonepistatic selection regimes. *Genetics* **91**, 777–798.
- 689 Kingsland S. 1982. The refractory model: the logistic curve and the history of population  
690 ecology. *Quart. Rev. Biol.* **57**, 29–52.
- 691 Kirkpatrick M. and Lande R. 1989 The evolution of maternal characters. *Evolution* **43**, 485–  
692 503.
- 693 Krakauer D. C., Page K. M. and Erwin D. H. 2009 Diversity, dilemmas and monopolies of  
694 niche construction. *Am. Nat.* **173**, 26–40.
- 695 Kylafis G. and Loreau M. 2008 Ecological and evolutionary consequences of niche  
696 construction for its agent. *Ecol. Lett.* **11**, 1072–1081.
- 697 Laland K. N. 2015 On evolutionary causes and evolutionary processes. *Behav. Processes* **117**,  
698 97–104.
- 699 Laland K. N. and Sterelny K. 2006 Perspective: seven reasons (not) to neglect niche  
700 construction. *Evolution* **60**, 1751–1762.
- 701 Laland K. N., Odling-Smee F. J. and Feldman M. W. 1996 The evolutionary consequences of  
702 niche construction: a theoretical investigation using two-locus theory. *J. Evol. Biol.* **9**, 292–  
703 316.
- 704 Laland K. N., Odling-Smee F. J. and Feldman M. W. 1999 Evolutionary consequences of  
705 niche construction and their implications for ecology. *Proc. Natl. Acad. Sci. USA* **96**, 10242–  
706 10247.

- 707 Laland K. N., Odling-Smee F. J. and Feldman M. W. 2000 Niche construction, biological  
708 evolution and cultural change. *Behav. Brain Sci.* **23**, 131–175.
- 709 Laland K. N., Odling-Smee F. J. and Feldman M. W. 2001 Cultural niche construction and  
710 human evolution. *J. Evol. Biol.* **14**, 22–33.
- 711 Laland K. N., Odling-Smee F. J. and Feldman M. W. 2005 On the breadth and significance  
712 of niche construction: a reply to Griffiths, Okasha and Sterelny. *Biol. Philos.* **20**, 37–55.
- 713 Laland K. N., Odling-Smee F. J. and Gilbert S. F. 2008 EvoDevo and niche construction:  
714 building bridges. *J. Exp. Zool. (Mol. Dev. Evol.)* **310B**, 549–566.
- 715 Laland K. N., Boogert N. and Evans C. 2014a Niche construction, innovation and  
716 complexity. *Env. Innov. Societ. Transitions* **11**, 71–86.
- 717 Laland K. N., Odling-Smee J. and Turner S. 2014b The role of internal and external  
718 constructive processes in evolution. *J. Physiol.* **592**, 2413–2422.
- 719 Laland K. N., Uller, T., Feldman M. W., Sterelny K., Müller, G. B., Moczek A., Jablonka E.  
720 and Odling-Smee J. 2014c Does evolutionary theory need a rethink? Yes, urgently. *Nature*  
721 **514**, 161–164.
- 722 Laland K. N., Uller T., Feldman M. W., Sterelny K., Müller G. B., Moczek A., Jablonka E.  
723 and Odling-Smee J. 2015 The extended evolutionary synthesis: its structure, assumptions and  
724 predictions. *Proc. R. Soc. B* **282**, 20151019.
- 725 Laland K. N., Matthews B. and Feldman M. W. 2016 An introduction to niche construction  
726 theory. *Evol. Ecol.* **30**, 191–202.
- 727 Lawrence P. A. 2003 The politics of publication. *Nature* **422**, 259–261.
- 728 Lee K. E. 1985 *Earthworms: their ecology and relation with soil and land use*. Academic  
729 Press, London, UK.



- 730 Lehmann L. 2007 The evolution of trans-generational altruism: kin selection meets niche  
731 construction. *J. Evol. Biol.* **20**, 181–189.
- 732 Lehmann L. 2008 The evolutionary dynamics of niche constructing traits in spatially  
733 subdivided populations: evolving posthumous extended phenotypes. *Evolution* **62**, 546–566.
- 734 Lewontin R. C. 1983 Gene, organism, and environment. In *Evolution from molecules to men*  
735 (Bendall D. S., ed.), pp. 273-285. Cambridge University Press, Cambridge, UK.
- 736 Lewontin R. C. 2000 *The triple helix: gene, organism, and environment*. Harvard University  
737 Press, Cambridge, MA, USA.
- 738 Maes M. 2015 A review on citation amnesia in depression and inflammation research.  
739 *Neuroendocrinol. Lett.* **36**, 1–6.
- 740 Malthus T. R. 1798 An essay on the principle of population, as it affects the future  
741 improvement of society. Johnson, London, UK.
- 742 Maynard Smith J. 1966 Sympatric speciation. *Am. Nat.* **100**, 637–650.
- 743 Mayr E. 1961 Cause and effect in biology. *Science* **134**, 1501–1506.
- 744 Mueller L. D., Rauser C. L. and Rose M. R. 2005 Population dynamics, life history and  
745 demography: lessons from *Drosophila*. *Adv. Ecol. Res.* **37**, 77–99.
- 746 Nagarajan A., Natarajan S. B., Jayaram M., Thammanna A., Chari S., Bose J., Jois S. V. and  
747 Joshi A. 2016 Adaptation to larval crowding in *Drosophila ananassae* and *Drosophila*  
748 *nasuta*: increased larval competitive ability without increased larval feeding rate. *J. Genet.* **95**,  
749 411–425.
- 750 O'Brien M. J. and Laland K. N. 2012 Genes, culture and agriculture, an example of human  
751 niche construction. *Curr. Anthropol.* **53**, 434–470.

- 752 Odling-Smee F. J. 1988 Niche constructing phenotypes. In *The role of behavior in evolution*  
753 (Plotkin H. C., ed.), pp. 73–132. MIT Press, Cambridge, MA, USA.
- 754 Odling-Smee F. J., Laland K. N. and Feldman M. W. 1996 Niche construction. *Am. Nat.* **147**,  
755 641–648.
- 756 Odling-Smee F. J., Laland K. N. and Feldman M. W. 2003 *Niche construction: the neglected*  
757 *process in evolution*. Princeton University Press, Princeton, NJ, USA.
- 758 Odling-Smee F. J., Erwin D. H., Palcovaks E. P., Feldman M. W. and Laland K. N. 2013  
759 Niche construction theory: a practical guide for ecologists. *Quart. Rev. Biol.* **88**, 3–28.
- 760 Okasha S. 2005 On niche construction and extended evolutionary theory. *Biol. Philos.* **20**, 1–  
761 10.
- 762 Prasad N. G., Dey S., Joshi A. and Vidya T. N. C. 2015 Rethinking inheritance, yet again:  
763 inheritomes, contextomes and dynamic phenotypes. *J. Genet.* **94**, 367–376.
- 764 Quetelet A. 1835 *Sur l'homme et le développement de ses facultés: ou Essai de physique*  
765 *sociale*. Bachelier, Paris, France.
- 766 Rausher M. D. 1984 The evolution of habitat selection in subdivided populations. *Evolution*  
767 **38**, 596–608.
- 768 Richards R. J. 2008 *The tragic sense of life: Ernst Haeckel and the struggle over*  
769 *evolutionary thought*. The University of Chicago Press, Chicago, IL, USA.
- 770 Robinson K. A. and Goodman S. N. 2011 A systematic examination of the citation of prior  
771 research in reports of randomized, controlled trials. *Ann. Intern. Med.* **154**, 50–55.
- 772 Sarangi M., Nagarajan A., Dey S., Bose J. and Joshi A. 2016 Evolution of increased larval  
773 ability in *Drosophila melanogaster* without increased larval feeding rate. *J. Genet.* **95**, 491–  
774 503.

- 775 Silver M. and Di Paolo E. A. 2006 Spatial effects favour the evolution of niche construction.  
776 *Theor. Popul. Biol.* **70**, 387–400.
- 777 Smaldino P. E. and McElreath R. 2016 The natural selection of bad science. *R. Soc. Open*  
778 *Sci.* **3**, 160384.
- 779 Song F., Parekh S., Hooper L., Loke Y. K., Ryder J., Sutton A. J., Hing C., Kwok C. S., Pang  
780 C. and Harvey I. 2010 Dissemination and publication of research findings: an updated review  
781 of related biases. *Health Technol. Assess.* **14**, 1–193.
- 782 Teixeira M. C., Thomaz S. M., Michelan T. S., Mormul R. P., Meurer T., Fasolli J. V. B. and  
783 Silveira M. J. 2013 Incorrect citations give unfair credit to review authors in ecology journals.  
784 *PLoS One* **8**, e81871.
- 785 Thompson J. N. 1994 *The coevolutionary process*. The University of Chicago Press, Chicago,  
786 IL, USA.
- 787 Thompson J. N. 2005 *The geographic mosaic of coevolution*. The University of Chicago  
788 Press, Chicago, IL, USA.
- 789 Thompson J. N. 2013 *Relentless evolution*. The University of Chicago Press, Chicago, IL,  
790 USA.
- 791 Van Dyken J. D. and Wade M. J. 2012 Origins of altruism diversity II: runaway coevolution  
792 of altruistic strategies via “reciprocal niche construction”. *Evolution* **66**, 2498–2513.
- 793 Van Valen L. 1973 A new evolutionary law. *Evol. Theor.* **1**, 1–30.
- 794 Wallach E. 2016 Niche construction theory as an explanatory framework for human  
795 phenomena. *Synthese* **193**, 2595–2618.
- 796 Zhang F., Tao Y. and Hui C. 2012 Organism-induced habitat restoration leads to bi-stability  
797 in metapopulations. *Math. Biosci.* **240**, 260–266.

## 798 **Appendix 1: Models of Niche Construction**

799

800 Here we discuss, in some detail, the three early and often cited models of niche construction that  
801 have been described as extending the understanding possible through SET, and as constituting an  
802 extensive body of formal theory (Laland *et al.* 2016). Two of these models (Laland *et al.* 1996,  
803 1999) are based on standard di-allelic two locus population genetic models with multiplicative  
804 fitnesses (general discussion in Hartl and Clark 1989), where one locus specifies a niche  
805 constructing phenotype which, in turn, affects fitness through genotypes at the second locus as a  
806 result of the specific environmental perturbations it causes. The third model (Laland *et al.* 2001)  
807 is a gene-culture coevolution model where the niche constructing trait is culturally inherited. We  
808 start by describing the di-allelic two locus genetic models (Laland *et al.* 1996, 1999). This  
809 appendix is aimed at readers familiar with population genetics models in order to show clearly  
810 how these foundational NCT models do not add anything substantial to what is already known  
811 from standard two-locus viability selection models incorporating frequency-dependent and  
812 epistatic effects on fitness.

813

### 814 ***Genetic models***

815 In these models, the niche constructing activity is controlled by a locus labelled  $E$ . At this locus,  
816 there are two alleles,  $E$  and  $e$ , and the niche constructing ability of the population, reflected  
817 entirely by resource levels, is directly proportional to the frequency of the allele  $E$ , given by  $p$ . A  
818 resource,  $R$ , is defined such that its amount is directly proportional to the niche constructing  
819 activities of the present and past generations. In the first model (Laland *et al.* 1996),  $R$  depends  
820 on  $n$  previous generations of niche construction and the  $n$  generations can either weigh in equally,

821 or there can be recency or primacy effects. A recency effect entails generations closer to the  
 822 present generation having a larger effect on  $R$  than the ones further in the past. A primacy effect  
 823 entails generations further into the past having a larger effect on  $R$  than the ones which are more  
 824 recent. In the second model (Laland *et al.* 1999),  $R$  is also affected by autonomous ecological  
 825 mechanisms of resource depletion or recovery, besides the niche constructing activity of the  
 826 population. In this case,  $R$  is given by the following recursion equation:

$$827 \quad R_t = \lambda_1 R_{t-1}(1 - \gamma p_t) + \lambda_2 p_t + \lambda_3,$$

828 where  $R_t$  is the amount of resource in the present generation,  $R_{t-1}$  is the amount of resource in the  
 829 previous generation,  $\lambda_1$  determines independent depletion,  $\lambda_2$  determines effect of positive niche  
 830 construction,  $\lambda_3$  determines independent renewal, and  $\gamma$  determines effect of negative niche  
 831 construction. In both models,  $R$  is constrained to be between 0 and 1 ( $0 < R < 1$ ) and the value of  $R$   
 832 determines fitness through genotypes at a second locus,  $A$ , with alleles,  $A$  and  $a$ .  $A$  is favoured  
 833 when  $R$  is high (above 0.5), whereas  $a$  is favoured when  $R$  is low (below 0.5). The two-locus  
 834 genotypic fitnesses are given in Table 1 in terms of  $R$  and marginal one locus genotypic fitnesses.  
 835

836 **Table 1.** Matrix of two-locus genotypic fitnesses for the first two models (Laland *et al.* 1996,  
 837 1999). The symbols in brackets alongside the one locus genotype symbols are one locus  
 838 marginal genotypic fitnesses.  $f$  is either 0.5, 1, or 2 in the first model, whereas it is 1 in the  
 839 second model.

| Locus           | $EE (\alpha_1)$                                     | $Ee (1)$                                     | $Ee (\beta_1)$                                     |
|-----------------|-----------------------------------------------------|----------------------------------------------|----------------------------------------------------|
| $AA (\alpha_2)$ | $w_{11} = \alpha_1 \alpha_2 + \varepsilon R^f$      | $w_{12} = \alpha_2 + \varepsilon R^f$        | $w_{13} = \beta_1 \alpha_2 + \varepsilon R^f$      |
| $Aa (1)$        | $w_{21} = \alpha_1 + \varepsilon \sqrt{(R(1-R))^f}$ | $w_{22} = 1 + \varepsilon \sqrt{(R(1-R))^f}$ | $w_{23} = \beta_1 + \varepsilon \sqrt{(R(1-R))^f}$ |

|                |                                                 |                                         |                                                |
|----------------|-------------------------------------------------|-----------------------------------------|------------------------------------------------|
| $aa (\beta_2)$ | $w_{31} = \alpha_1\beta_2 + \varepsilon(1-R)^f$ | $W_{32} = \beta_2 + \varepsilon(1-R)^f$ | $w_{33} = \beta_1\beta_2 + \varepsilon(1-R)^f$ |
|----------------|-------------------------------------------------|-----------------------------------------|------------------------------------------------|

840

841 In Table 1,  $\varepsilon$  gives the strength and direction of niche construction ( $-1 < \varepsilon < 1$ ). The two locus  
 842 gametic frequencies are given by  $x_1$ ,  $x_2$ ,  $x_3$ , and  $x_4$  for  $EA$ ,  $Ea$ ,  $eA$ , and  $ea$ , respectively. The  
 843 recombination rate is given by  $r$ . Then, the gametic recursions are given by,

844 
$$Wx_1^* = [x_1(x_1w_{11} + x_2w_{21} + x_3w_{12} + x_4w_{22})] - rw_{22}D$$

845 
$$Wx_2^* = [x_2(x_1w_{21} + x_2w_{31} + x_3w_{22} + x_4w_{32})] + rw_{22}D$$

846 
$$Wx_3^* = [x_3(x_1w_{12} + x_2w_{22} + x_3w_{13} + x_4w_{23})] + rw_{22}D$$

847 
$$Wx_4^* = [x_4(x_1w_{22} + x_2w_{32} + x_3w_{23} + x_4w_{33})] - rw_{22}D,$$

848 where  $x_1^*$ ,  $x_2^*$ ,  $x_3^*$ , and  $x_4^*$  are two locus gametic frequencies in the next generation, and  $D$  is the  
 849 linkage disequilibrium given by,

850 
$$D = x_1x_4 - x_2x_3,$$

851 and  $W$ , the mean fitness of the population, is the sum of all the right-hand sides in the gametic  
 852 recursions. The dynamics of this model were studied under four conditions, namely, no external  
 853 selection at  $E$  or  $A$  loci, external selection at the  $A$  locus, external selection at the  $E$  locus, and  
 854 overdominance at both loci.

855

856 1. No external selection

857 No external selection means that frequency of the  $E$  allele remains constant ( $\alpha_1 = \beta_1 = \alpha_2 = \beta_2 =$   
 858 1). Thus, the amount of resource remains constant in the first model and attains an equilibrium  
 859 value in the second model. If these values are above 0.5, then allele  $A$  gets fixed and otherwise  
 860 allele  $a$  gets fixed due to the selection generated by niche construction. The line,  $R = 0.5$ , defines

861 a neutrally stable equilibrium in both models. Fixation of allele  $A$  is unstable below  $R = 0.5$  and  
862 fixation of allele  $a$  is unstable above  $R = 0.5$ .

863

## 864 2. External selection at the $E$ locus

865 If selection favours allele  $E$  ( $\alpha_1 > 1 > \beta_1$ ,  $\alpha_2 = \beta_2 = 1$ ), alleles  $E$  and  $A$  get fixed ( $x_1 = 1$ ) if  $\varepsilon$  is  
866 positive and alleles  $E$  and  $a$  get fixed ( $x_2 = 1$ ) if  $\varepsilon$  is negative. If selection favours allele  $e$  ( $\alpha_1 < 1$   
867  $< \beta_1$ ,  $\alpha_2 = \beta_2 = 1$ ), alleles  $e$  and  $a$  get fixed ( $x_4 = 1$ ) if  $\varepsilon$  is positive and alleles  $e$  and  $A$  get fixed ( $x_3$   
868  $= 1$ ) if  $\varepsilon$  is negative. In the model with independent renewal and depletion of  $R$ , an additional  
869 caveat on the result is whether  $R$  is less than one half or more at the fixation value of  $E$  or  $e$ ,  
870 respectively. Allele  $A$  gets fixed if  $R > 1/2$  at fixation of either allele at the  $E$  locus, whereas  
871 allele  $a$  gets fixed if  $R < 1/2$ . A range of polymorphic equilibria are obtained if  $R = 1/2$ .

872

873 In the first model, if more than one previous generation of niche construction affects  $R$  ( $n > 1$ ),  
874 then time lags between the start of selection at locus  $E$  and response at locus  $A$  can occur as  $R$   
875 builds up slower than the rate of fixation at locus  $E$ . This evolutionary inertia is largest when  
876 there is a primacy effect and smallest when there is a recency effect. A similar process can lead  
877 to an evolutionary momentum type of effect as well when the selection at locus  $E$  stops or  
878 reverses because there is a lag between the frequency of allele  $E$  and the amount of resource  
879 accumulated. Such effects are not seen in the second model as there are no primacy effects in it.  
880 But, they can be obtained by making  $\lambda_2 = 1/n$ , i.e., a primacy effect.

881

882 In the second model, the rate of fixation of allele  $A$  when allele  $E$  is being favoured by external  
883 selection is dependent on magnitude of the impact of niche construction on the resource ( $\lambda_2$ ).

884 Increasing the value of  $\lambda_2$  increases the value of  $R$ , and, if  $R$  is near 1, this reduces the difference  
885 in fitness between the genotypes  $AaEE$  and  $aaEE$ , thus, remarkably reducing the rate of fixation  
886 of allele  $A$ .

887

### 888 3. External selection at the $A$ locus

889 In the first model, if external selection favours allele  $A$  ( $\alpha_1 = \beta_1 = 1$ ,  $\alpha_2 > 1 > \beta_2$ ) and there is no  
890 niche construction ( $\varepsilon = 0$ ), or selection due to it is very weak ( $1 - \alpha_2 < \varepsilon < 1 - \beta_2$ ), allele  $A$  always  
891 gets fixed if it is present. Near  $x_4 = 1$ , if  $\varepsilon > 1 - \beta_2$ , fixation of allele  $a$  is neutrally stable. A set of  
892 polymorphic equilibria are possible near  $x_1 = 1$ , with alleles  $e$  and  $a$  increasing, if  $1 - \alpha_2 > \varepsilon$ .

893 In the second model, if external selection favours allele  $A$  ( $\alpha_1 = \beta_1 = 1$ ,  $\alpha_2 > 1 > \beta_2$ ) and is weak,  
894 niche construction is positive ( $\lambda_2 > 0$ ,  $\gamma = 0$ ), and  $\varepsilon$  is greater than zero, then for small values of  $R$   
895 selection due to niche construction can take allele  $a$  to fixation. Also, there are a range of values  
896 of  $R$ , for which stable equilibria for fixation of alleles  $A$  and  $a$  overlap. If external selection is  
897 strong then fixation of allele  $a$  becomes less probable. If niche construction is negative ( $\lambda_2 = 0$ ,  $\gamma >$   
898  $0$ ) fixation of allele  $a$  still happens at low values of  $R$ , but, now those correspond to higher values  
899 of  $p$  instead of lower in the case of positive niche construction. For negative values of  $\varepsilon$  and  
900 positive niche construction, fixation of both  $a$  and  $A$  alleles becomes unstable and a set of stable  
901 polymorphisms are possible. If niche construction becomes negative, stable polymorphisms are  
902 possible near  $x_3 = 1$  and allele  $A$  gets fixed for rest of the parameter space.

903

### 904 4. Overdominance at both loci

905 Di-allelic two locus viability models can have a maximum of four gamete fixation states, four  
906 allelic fixation states, and seven interior fixation states (Karlin 1975). The results from



907 overdominance ( $\alpha_1, \alpha_2, \beta_3, \beta_4 < 1$ ) are too complicated and varied to go into detail here, but  
908 generally, the effect of niche construction is to move the interior polymorphic equilibria and the  
909 edge equilibria (when they exist) towards higher values of  $q$ , when  $R$  is more than one half and  
910 towards lower values of  $q$  when  $R$  is less than one half. The magnitude of shift depends on the  
911 how far frequency of allele  $E$  is from one half. For high values of  $\varepsilon$  the edge equilibria can even  
912 merge with the respective gamete fixation states. For tightly linked loci (small  $r$ ), niche  
913 construction can either increase or decrease linkage disequilibrium at genetic equilibrium.  
914 Equilibrium frequencies of allele  $E$  greater than one half ( $p > 1/2$ ) result in increase in  
915 equilibrium frequencies of gametes  $AE$  and  $Ae$  and equilibrium frequencies of allele  $E$  less than  
916 one half ( $p < 1/2$ ) result in decrease in equilibrium frequencies of gametes  $aE$  and  $ae$ . In the  
917 second model, these effects of niche construction persist, for some sets of parameter values, even  
918 when there is external renewal or depletion of the resource.

919  
920 It is important to note that these two models have different meanings of positive and negative  
921 niche construction (Laland *et al.* 2005). For the first model, positive niche construction ( $\varepsilon > 0$ )  
922 means that increase in  $R$  increases the fitness of allele  $A$ . For the second model, positive niche  
923 construction implies that  $\lambda_2 > 0, \gamma = 0$ ; negative niche construction implies that  $\lambda_2 = 0, \gamma > 0$ ,  
924 meaning that increase in frequency of allele  $E$  ( $p$ ) results in an increase in  $R$ , even though the  
925 sign of  $\varepsilon$  still mediates the effect of  $R$  on selection at the  $A$  locus.

926

### 927 ***Cultural model***

928 We turn now to the third model in which the niche constructing trait is culturally inherited. A  
929 niche constructing trait  $E$  with variants  $E$  and  $e$  is postulated as a culturally inherited trait. A

930 resource  $R$  depends on either  $n$  previous generations of niche construction, i.e., the frequency of  
 931 trait variant  $E(x)$  (Model 1), or on niche construction and independent renewal or depletion  
 932 following the same equation for  $R$  as in the second model (Model 2). A genetic locus  $A$  is  
 933 postulated with alleles  $A$  and  $a$ , and its fitness is affected by amount of resource present with  
 934 allele  $A$  being favoured when  $R > 1/2$  and allele  $a$  being favoured when  $R < 1/2$ . The six pheno-  
 935 genotypes,  $AAE$ ,  $AAe$ ,  $AaE$ ,  $Aae$ ,  $aaE$  and  $aae$ , have frequencies  $z_1-z_6$  and their fitnesses are  
 936 given in Table 2. Rules for vertical cultural transmission are given in Table 3.

937  
 938 **Table 2.** Matrix of pheno-genotypic fitnesses in terms of marginal trait/genotypic fitnesses given  
 939 in brackets.

|               | $E (\alpha_1)$                                  | $e (\alpha_2)$                                  |
|---------------|-------------------------------------------------|-------------------------------------------------|
| $AA (\eta_1)$ | $w_{11} = \alpha_1 \eta_1 + \varepsilon R$      | $w_{12} = \alpha_2 \eta_1 + \varepsilon R$      |
| $Aa (1)$      | $w_{21} = \alpha_1 + \varepsilon \sqrt{R(1-R)}$ | $w_{22} = \alpha_2 + \varepsilon \sqrt{R(1-R)}$ |
| $aa (\eta_2)$ | $w_{31} = \alpha_1 \eta_2 + \varepsilon(1-R)$   | $w_{32} = \alpha_2 \eta_2 + \varepsilon(1-R)$   |

940  
 941 **Table 3.** Probabilities of offspring having trait  $E$  or  $e$  for each combination of parental mating.

| Matings      | Offspring |           |
|--------------|-----------|-----------|
|              | $E$       | $e$       |
| $E \times E$ | $b_3$     | $1 - b_3$ |
| $E \times e$ | $b_2$     | $1 - b_2$ |

|              |       |           |
|--------------|-------|-----------|
| $e \times E$ | $b_1$ | $1 - b_1$ |
| $e \times e$ | $b_0$ | $1 - b_0$ |

942

943 Three specific cultural transmission scenarios were analysed: unbiased transmission ( $b_3 = 1, b_2 =$   
944  $b_1 = 0.5, b_0 = 1$ ), biased transmission ( $b_3 = 1, b_2 = b_1 = b, b_0 = 1, b \neq 0.5$ ), and incomplete  
945 transmission ( $b_3 = 1 - \delta, b_2 = b_1 = b, b_0 = \delta, \delta > 0$ ). For ease of analysis, the recursions were  
946 written in terms of allelo-phenotypic frequencies, namely,  $AE, aE, Ae,$  and  $ae$  (for the equations  
947 see Laland *et al.* 2001). Similar results were obtained for both model 1 and model 2 unless  
948 otherwise stated.

949

#### 950 1. No external selection

951 For unbiased transmission, the results for model 1 are analogous to Laland *et al.* (1996; see  
952 above) and the results for model 2 are analogous to Laland *et al.* (1999; see above).

953 For biased transmission, frequency of trait  $E$  increases if  $b > 0.5$  and that of trait  $e$  increases if  $b$   
954  $< 0.5$ . For positive values of  $\varepsilon$  and  $b < 0.5$ ,  $ae$  is fixed at equilibrium values of  $R < 0.5$  and  $Ae$  is  
955 fixed at equilibrium values of  $R > 0.5$ . If  $b > 0.5$ , trait  $E$  gets fixed instead of trait  $e$ . Symmetric  
956 results are obtained when  $\varepsilon$  is negative.

957

958 For incomplete transmission, when  $\delta > 0$  and  $b = 0.5$  the cultural trait remains polymorphic and a  
959 line of neutrally stable equilibria is obtained for locus  $A$ . If  $b \neq 0$  and  $\varepsilon$  is positive allele  $A$  gets  
960 fixed for equilibrium values of  $R > 0.5$  and allele  $a$  get fixed for equilibrium values of  $R < 0.5$ .  
961 Symmetric results are obtained when  $\varepsilon$  is negative.

962

963 2. External selection at the A locus

964 Again, for unbiased transmission, the results for model 1 are analogous to Laland *et al.* (1996;  
965 see above) and the results for model 2 are analogous to Laland *et al.* (1999; see above).

966

967 For biased transmission, when cultural transmission favours trait  $E$  ( $b > 0.5$ ) and  $\varepsilon$  is positive,  
968 whether external selection at the  $A$  locus is opposed or not depends on the value of  $R$  at fixation  
969 of trait  $E$ . The positive  $\varepsilon$  and increasing frequency of trait  $E$  make it improbable that  $R$  will be  
970 lower than 0.5 at equilibrium. For cultural transmission favouring trait  $e$  ( $b < 0.5$ ),  $R$  ends up  
971 being low enough for fixation of allele  $a$  instead of  $A$  more often. When  $\varepsilon$  is negative, three  
972 polymorphic equilibria are possible depending on value of  $R$ , namely, fixation of  $AE$ , fixation of  
973  $aE$ , or an equilibrium polymorphic for alleles  $A$  and  $a$ . Symmetrically opposite results are  
974 obtained when niche construction is negative, i.e., trait  $E$  is responsible for depletion of the  
975 resource.

976

977 For incomplete transmission, a polymorphism for the cultural trait is obtained, and if  $\varepsilon$  is positive,  
978 either of the alleles  $A$  or  $a$  get fixed, depending on value of  $R$  at the equilibrium frequency of the  
979 cultural trait. If  $\varepsilon$  is negative, a fully polymorphic equilibrium is possible for very high values of  
980  $R$  at equilibrium.

981

982 3. Selection at the cultural trait

983 Again, for unbiased transmission, the results for model 1 are analogous to Laland *et al.* (1996;  
984 see above) and the results for model 2 are analogous to Laland *et al.* (1999; see above).

985

986 For biased transmission, when natural selection and transmission bias reinforce each other by  
987 either favouring  $E$  ( $\alpha_1 > 1 > \alpha_2; b > 0.5$ ) or  $e$  ( $\alpha_1 < 1 < \alpha_2; b < 0.5$ ),  $AE$  or  $ae$  get fixed for positive  
988 values of  $\varepsilon$ . When these processes work against each other than their relative strength determines  
989 the final equilibrium. In such a scenario, cultural transmission can fix the trait which is not  
990 favoured by selection, if transmission bias is strong enough.

991  
992 For incomplete transmission, the frequency of the cultural trait is given by a cubic equation (see  
993 Laland *et al.* 2001). For model 1, if  $n > 1$  then time lags are obtained as in the analogous genetic  
994 model (Laland *et al.* 1996). The length of the time lag depends on both the selection coefficients  
995 and transmission bias with cultural transmission usually shortening the lags as compared to  
996 completely genetic models.

997  
998 4. Overdominance at the A locus

999 For unbiased transmission, polymorphisms at the locus  $A$  are possible if the selection due to  
1000 niche construction does not completely overcome the external selection at the  $A$  locus, i.e.,  $R$  is  
1001 either too large or too small.

1002  
1003 For biased transmission, polymorphisms at the  $E$  trait no longer exist and either trait  $E$  or  $e$  gets  
1004 fixed. Frequency of alleles at the  $A$  locus depends on the interplay of external selection and  
1005 selection due to niche construction.

1006  
1007 For incomplete transmission, if there is no statistical association between the cultural trait and  
1008 the genetic locus then a single polymorphic equilibrium is obtained. Selection due to niche

1009 construction shifts this equilibrium from the point where it would have been had niche

1010 construction not been acting.

1011
